# Supplementary material for: Tree crickets optimize the acoustics of baffles to exaggerate their mate-attraction signal
Source: eLife journal article supplement (doi:10.7554/elife.32763), 2017-12-11
Supplement: supp [file elife-32763-supp-v1.zip]

Archive with 7 entries (7 files):
- elife_poa_e32763_Movie_S1.wmv
- elife_poa_e32763_Figure_2_figure_supplement_1.pdf
- elife_poa_e32763_Transparent_Reporting_File.pdf
- elife_poa_e32763_Figure_1_figure_supplement_1.pdf
- elife_poa_e32763_Figure_3_figure_supplement_1.pdf
- elife_poa_e32763_Movie_S2.wmv
- elife_poa_e32763_Figure_1_figure_supplement_2.pdf
