# Supplementary figures and images for: Tree crickets optimize the acoustics of baffles to exaggerate their mate-attraction signal
Source: eLife journal article supplement (doi:10.7554/elife.32763), 2017-12-11

### A - Oval baffle

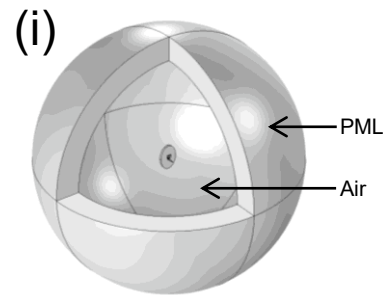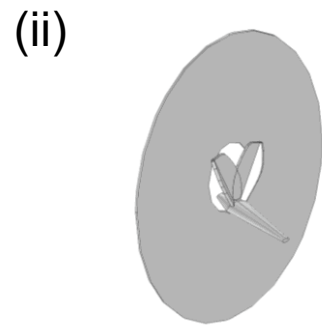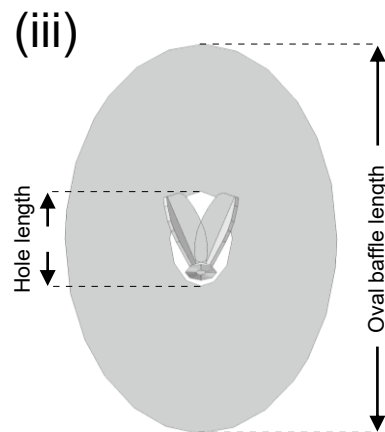

### B - Realistic baffle

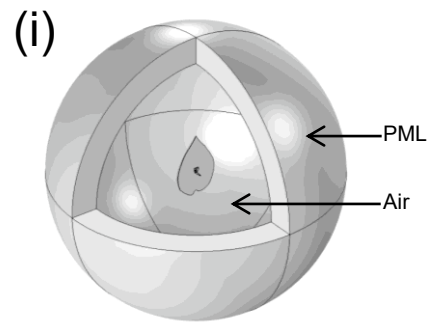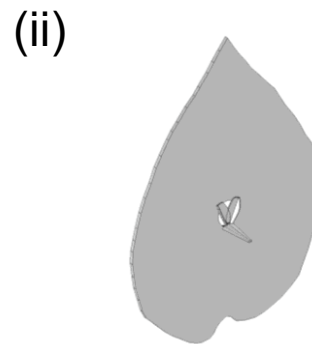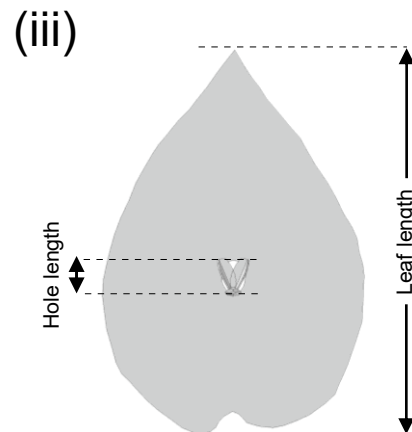

### C - Cricket

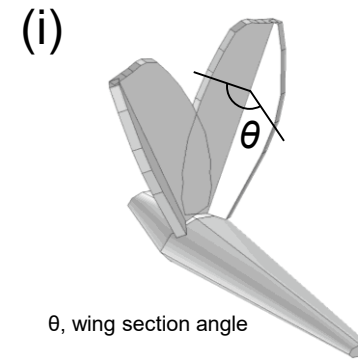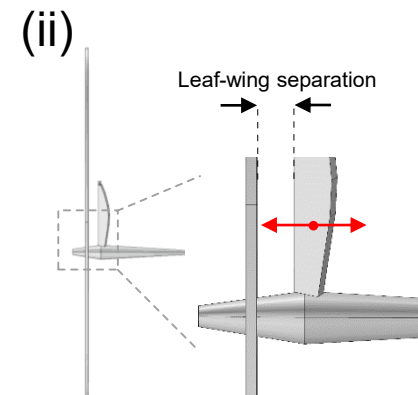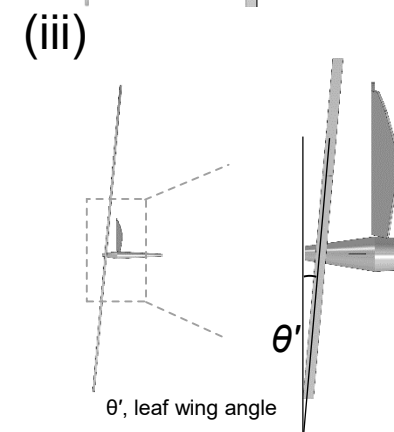

Figure 1- figure supplement 2

Supplement: supp [file elife-32763-supp-v1.zip]

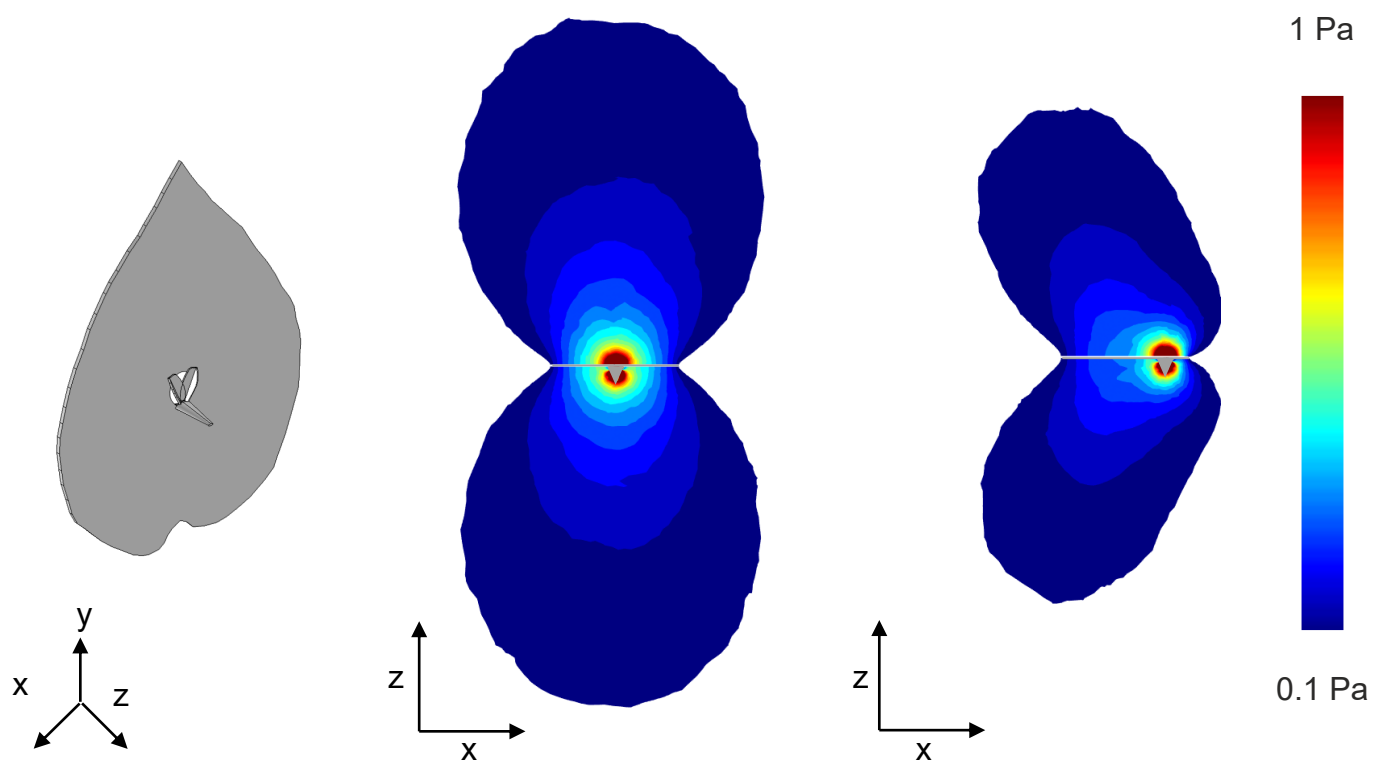

Sound field from central baffle    Sound field from off-centre baffle

Figure 2- figure supplement 1

Supplement: supp [file elife-32763-supp-v1.zip]

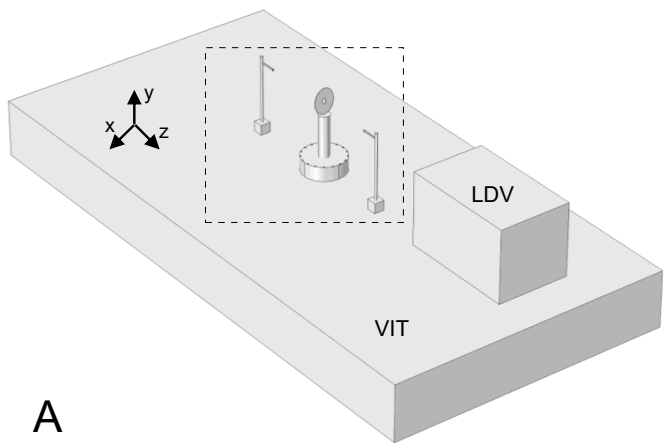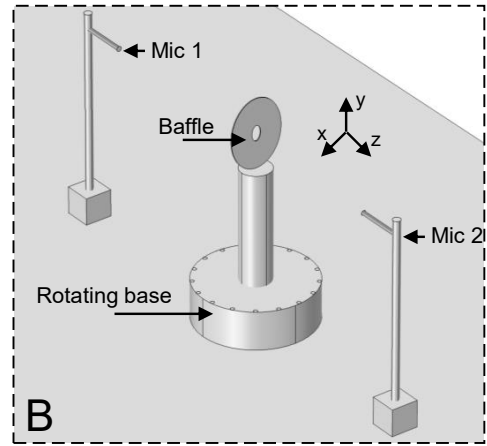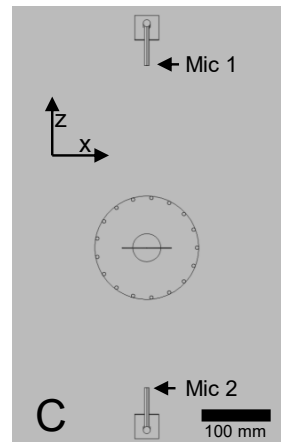

Figure 1- figure supplement 1

Supplement: supp [file elife-32763-supp-v1.zip › elife_poa_e32763_Figure_1_figure_supplement_1.pdf]

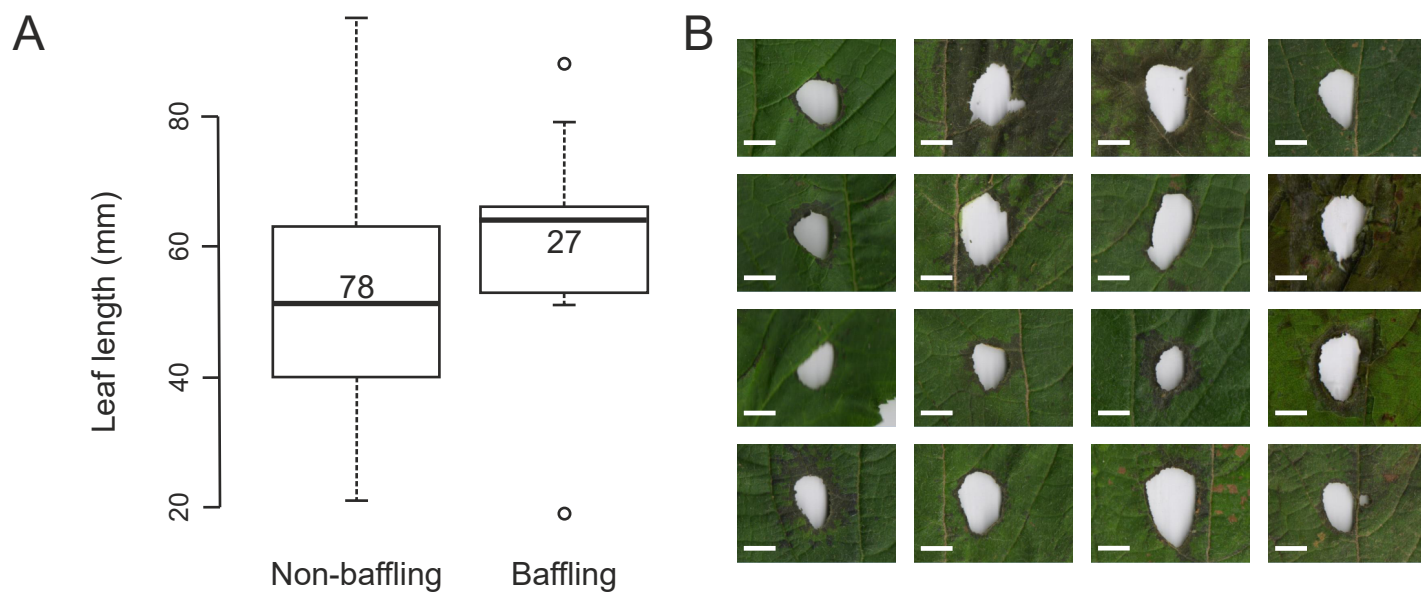

Figure 3- figure supplement 1

Supplement: supp [file elife-32763-supp-v1.zip › elife_poa_e32763_Figure_3_figure_supplement_1.pdf]
